# Supplementary material for: Cyclodextrin Complexation of Fenofibrate by Co-Grinding Method and Monitoring the Process Using Complementary Analytical Tools
Source: MDPI journal article supplement (doi:10.3390/pharmaceutics14071329), 2022-06-23
Supplement: s1 [file s1]

Figure S1 shows thermograms of the API and the excipient obtained by DSC measurements. FEN Form-I polymorph has a characteristic endothermic peak at *ca* 80.5 °C. An endothermic signal (between 25-85 °C) is observed for the CD, indicating the presence of water.

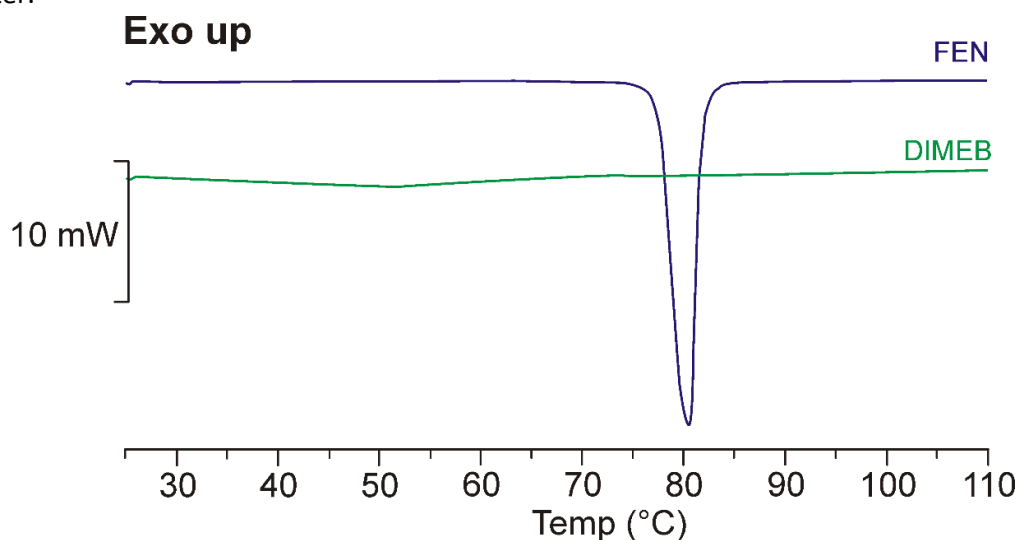

**Figure S1.** DSC thermograms of FEN and DIMEB.

XRPD measurements were performed with the parameters several times. Figure S2 shows the diffractograms of products immediately after the products are prepared and after 2 years. The products retained their amorphous properties during this long stability test.

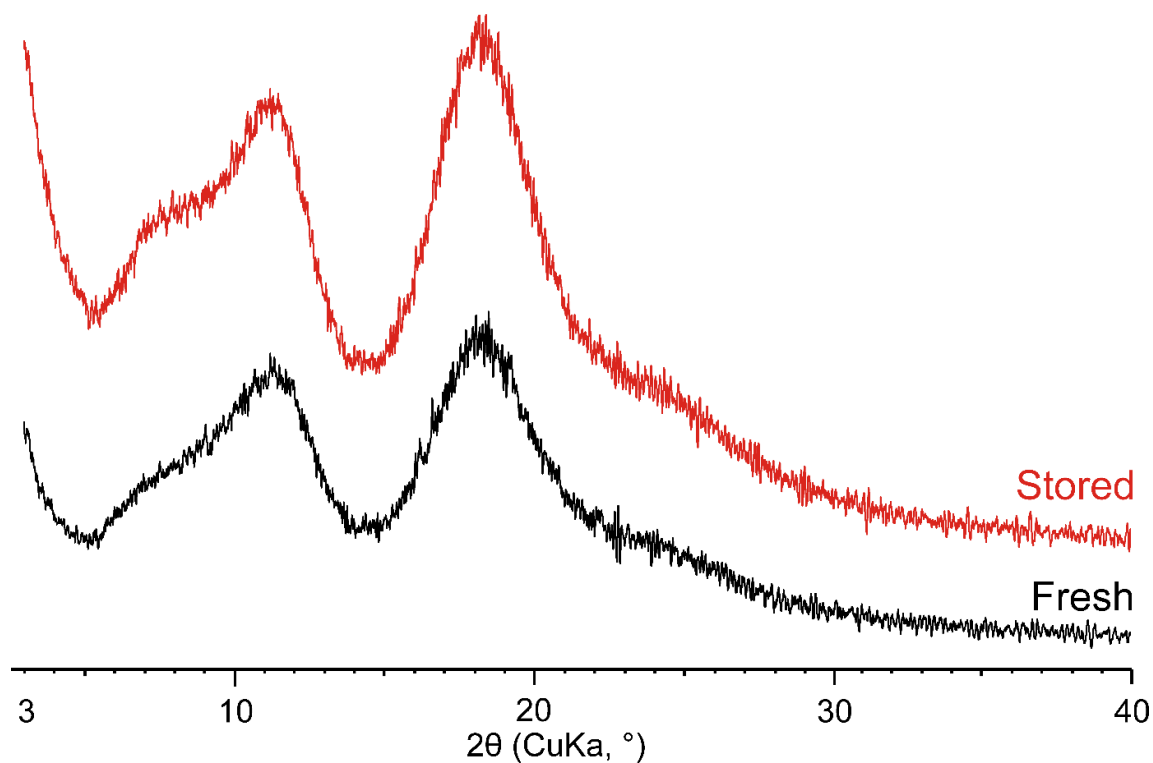

**Figure S2.** XRPD diffractograms of products after production and after 2 years of storage.

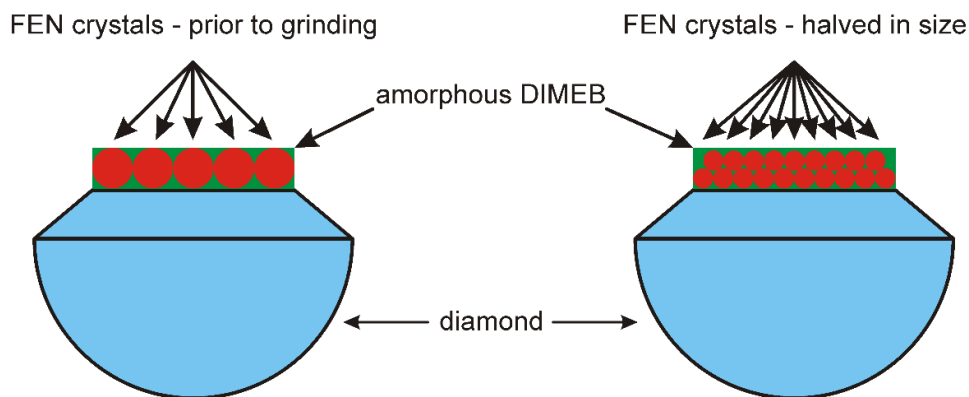

**Figure S3.** Schematic explanation of the changes in the relative intensities of FEN (red) and DIMEB (green) in the ATR spectra measured during the first 20 minutes of grinding. The same amount of material, distributed in particles smaller in size, increases the contact surface with the ATR element causing increased relative intensity in the recorded spectrum.

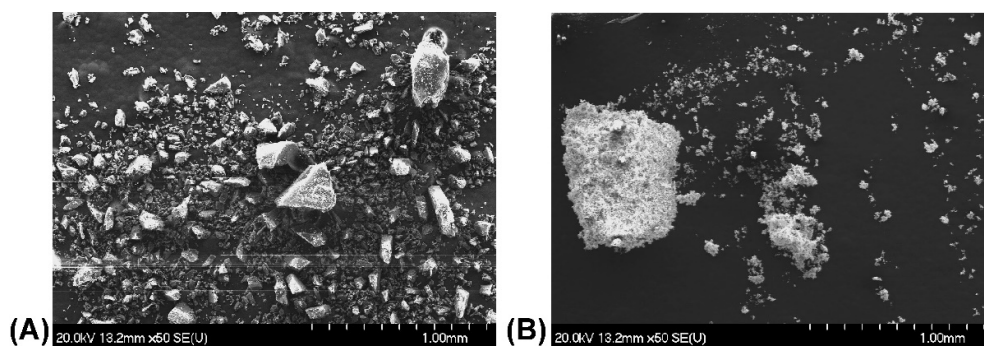

**Figure S4.** SEM images of FEN (A) and DIMEB (B), at magnification of 50, clearly showed the differences in crystallinity and the size of particles of the starting materials.

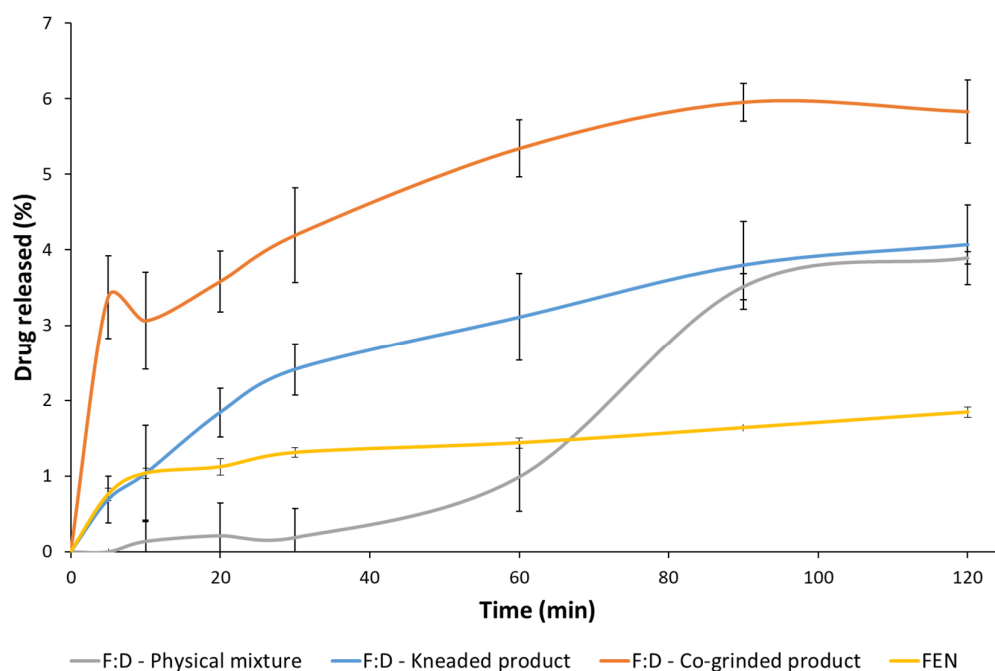

**Figure S5.** Diffusion curves of FEN, FEN:DIMEB (F:D) physical mixture, kneaded product, and co-ground product. Best diffusion properties were achieved by ground product.

**Table S1.** Assignment of peaks of FEN based on the literature data.

| Peak position/<br>cm <sup>-1</sup> | Description | Assignment* [6]                         | Assignment [5]                | Assignment                                                        | References  |
|------------------------------------|-------------|-----------------------------------------|-------------------------------|-------------------------------------------------------------------|-------------|
| 1729                               | s           | $\nu_{C=O}$ –<br>R-C=O<br>OR'           | $\nu_{C=O}$ –<br>R-C=O<br>OR' | C=O stretching of ester group                                     | [1] [3] [4] |
| 1651                               | s           | $\nu_{C=O}$ –<br>(Ar) <sub>2</sub> >C=O | $\nu_{C=O}$ –<br>Ar-C=O       | C=O stretching of carbonyl group                                  | [1] [3] [4] |
| 1599                               | s           | 8a<br>-O-                               | aromatic ring<br>stretching   | 8a and 8b mode of 1,4-O and<br>C=O subst. ring                    | [1]         |
| 1588                               | m           | 8a<br>Cl-                               | aromatic ring<br>stretching   | 8a and 8b mode of 1,4-Cl and<br>C=O subst. ring                   | [1]         |
| 1572                               | w           | 8b<br>X-                                | -                             | in-plane ring def. mode of 1,4-O<br>and C=O subst. ring- amorfous | [1]         |
| 1563                               | w           | 8b                                      | -                             | in-plane ring def. mode of 1,4-O                                  | [1]         |

|      |    | X-                   | and C=O subst. ring - crystalline                                |                                                                                   |           |
|------|----|----------------------|------------------------------------------------------------------|-----------------------------------------------------------------------------------|-----------|
| 1503 | m  | 19a<br>-O-           | aromatic ring stretching + C-H bending                           | ring stretch.                                                                     | [3]       |
| 1486 | w  | 19a<br>Cl-           | -                                                                |                                                                                   |           |
| 1467 | w  | $\delta_{as}^+ CH_3$ | >C(CH <sub>3</sub> ) <sub>2</sub><br>asym. out of phase bending  |                                                                                   |           |
| 1451 | w  |                      |                                                                  |                                                                                   |           |
| 1439 | vw |                      |                                                                  |                                                                                   |           |
| 1419 | m  | 19b<br>-O-           | aromatic ring stretching + C-H bending                           | in-plane ring def. mode of 1,4-O and C=O subst. ring                              | [1]       |
| 1398 | w  | 19b<br>Cl-           | -                                                                | -CH <sub>3</sub> in-phase bending                                                 | [5]       |
| 1385 | m  | $\delta_s CH_3$      | -                                                                | -CH <sub>3</sub> in-phase bending                                                 | [5]       |
| 1377 | w  | $\delta_s CH_3$      | >C(CH <sub>3</sub> ) <sub>2</sub><br>symmetric in phase bendings |                                                                                   |           |
| 1368 | w  | $\delta_s CH_3$      |                                                                  |                                                                                   |           |
| 1345 | vw | $\delta_s CH_3$      |                                                                  |                                                                                   |           |
| 1302 | s  | 14<br>Cl-            |                                                                  |                                                                                   |           |
| 1287 | s  | 3<br>Cl-             |                                                                  | aryl-ether                                                                        | [3]       |
| 1276 | m  | 3<br>-O-             | Ar-O-C stretching                                                | asym. C-C-O stretch. - ester group                                                | [1]       |
| 1249 | s  | -                    |                                                                  | asym. C-C-O stretch. - ring-O- /asym. C-C(=O)-C stretch.   ring in-plane C-H def. | [1]   [3] |
| 1205 | vw | -                    |                                                                  |                                                                                   |           |
| 1183 | s  | 9a<br>-O-            | -                                                                | in-plane C-H bending of O=C-ring-O-                                               | [1]       |
| 1174 | s  | -                    | -                                                                | ring in-plane C-H def.                                                            | [3]       |
| 1159 | s  | -                    | -CH <sub>3</sub> in plane rocking                                |                                                                                   |           |
| 1145 | s  | -                    |                                                                  | C-O-ring stretch.                                                                 | [1] [3]   |
| 1117 | m  | 18b<br>-O-           |                                                                  | ring in-plane C-H def.                                                            | [3]       |
| 1101 | s  | 18b<br>Cl-           | in plane aromatic ring deformations                              | (CH <sub>3</sub> ) <sub>2</sub> -HC-O- stretch.                                   | [1]       |
| 1088 | s  | 1<br>Cl-             |                                                                  | Cl-ring stretch.                                                                  | [1] [4]   |
| 1013 | m  | 18a<br>Cl-           |                                                                  | ring in-plane C-H def.                                                            | [3]       |
| 975  | m  | $\nu_{C-C}$          | -                                                                | ring in-plane C-H def.                                                            | [3]       |
| 925  | s  | -                    | -CH <sub>3</sub> in plane rocking                                |                                                                                   |           |
| 899  | vw | -                    |                                                                  |                                                                                   |           |

|     |    |           |                                               |                            |     |
|-----|----|-----------|-----------------------------------------------|----------------------------|-----|
| 860 | m  | 17b<br>X- |                                               | ring out of plane C-H def. | [3] |
| 844 | m  | 17b<br>X- | out of plane<br>aromatic ring<br>deformations | ring out of plane C-H def. | [3] |
| 824 | w  | 1†<br>O-  |                                               |                            |     |
| 819 | w  | 1†<br>O-  |                                               | O-CH<(CH3)2                | [2] |
| 765 | s  | 6a<br>Cl- | -                                             |                            |     |
| 740 | w  | -         |                                               |                            |     |
| 718 | vw | 4<br>Cl-  | out of plane<br>aromatic ring<br>deformations |                            |     |
| 683 | w  | 4†<br>-O- |                                               | ring out of plane C-H def. | [3] |
| 656 | m  | 4†<br>-O- |                                               |                            |     |
| 637 | vw | -         | -                                             |                            |     |
| 626 | vw | -         | -                                             |                            |     |

\* Based on the assignment of *p*-methoxy acetopenone and *p*-chloroacetophenon, using Wilson's notation for aromatic ring vibrations. The para substituent Cl- or -O- was given, when it was possible, and X- when it was uncertain.

† Either was possible to assign.

## References:

- [1] Heinz, A.; Gordon, K.C.; McGoverin, C.M.; Rades, T.; Strachan, C.J. Understanding the Solid-State Forms of Fenofibrate - A Spectroscopic and Computational Study. *Eur. J. Pharm. Biopharm.* 2009, **71**, 100–108.
- [2] P.J.Larkin. *IR and Raman Spectroscopy, Principles and Spectral Interpretation* Elsevier Inc., Oxford 2011
- [3] Tipduangta, P.; Takieddin, K.; Fabian, L.; Belton, P.; Qi, S. Towards Controlling the Crystallisation Behaviour of Fenofibrate Melt: Triggers of Crystallisation and Polymorphic Transformation. *Rsc Advances* **2018**, **8**, 13513–13525.
- [4] Vazquez, I.N.; Rodriguez-Nunez, J.R.; Pena-Caballero, V.; Ruvalcaba, R.M.; Aceves-Hernandez, J.M. Theoretical and Experimental Study of Fenofibrate and Simvastatin. *J. Mol. Struct.* 2017, **1149**, 683–693.
- [5] Colthup, N.B.; Daly, L.H.; Wieberley, S.E. *Introduction to Infrared and Raman Spectroscopy*. Academic Press: New York, 1990. pp. 218,236,250, 261-283.
- [6] Varsányi, György. *Assignments for vibrational spectra of seven hundred benzene derivatives*; Akadémiai Kiadó: Budapest, 1973; pp. 12, 128, 163, 550–551.
